# Supplementary material
Source: PubMed Central journal article supplement (PMC5542395)
Supplement: NIHMS879413-supplement-supplemental_table_1.pdf [file NIHMS879413-supplement-supplemental_table_1.pdf]

Supplementary Table 1. Cardiac surgery ICD-9-CM codes searched in the National Inpatient Sample from 1998–2013

| <b>Procedure</b>                                                                                                     | <b>ICD-9-CM Codes</b> | <b>CPT</b>                                                                                                                                                                                                                                                                                                                                                                                             |
|----------------------------------------------------------------------------------------------------------------------|-----------------------|--------------------------------------------------------------------------------------------------------------------------------------------------------------------------------------------------------------------------------------------------------------------------------------------------------------------------------------------------------------------------------------------------------|
| Aorto-coronary bypass: 1–4 or more coronary arteries (CABG)                                                          | 36.11–36.15           | 33510, 33511, 33512, 33513, 33514, 33516, 33517, 33518, 33519, 33521, 33522, 33523, 33530, 35600                                                                                                                                                                                                                                                                                                       |
| Extracorporeal circulation auxiliary to open heart surgery (cardiopulmonary bypass)                                  | 39.61, 39.62          | 32852, 33031, 33120, 33251, 33256, 33259, 33261, 33305, 33315, 33322, 33335, 33368, 33369, 33400, 33403, 33404, 33405, 33406, 33410, 33411, 33422, 33426, 33427, 33430, 33460, 33465, 33474, 33496, 33500, 33504, 33641, 33702, 33710, 33720, 33736, 33774, 33775, 33776, 33777, 33814, 33853, 33860, 33863, 33864, 33870, 33875, 33877, 33910, 33916, 33922, 33999, 35211, 35241, 35271, 52854, 99184 |
| Heart replacement procedures                                                                                         | 37.5x                 | 33944, 33945, 33999, 0051T, 0052T, 0053T, 99184                                                                                                                                                                                                                                                                                                                                                        |
| Insertion of implantable heart assist system                                                                         | 37.66                 | 33976, 33967, 33970, 33971, 33973, 33974, 33975, 33977, 33978, 33979, 33980, 33981, 33982, 33983, 33999, 92970                                                                                                                                                                                                                                                                                         |
| Open heart valvuloplasty of aortic valve without replacement, replacement with tissue graft, or other replacement    | 35.11, 35.21, 35.22   | 33400, 33401, 33403, 33417, 33602, 33406, 33410, 33411, 33412, 33413, 33365, 33404                                                                                                                                                                                                                                                                                                                     |
| Open heart valvuloplasty of mitral valve without replacement, replacement with tissue graft, or other replacement    | 35.12, 35.23, 35.24   | 33425, 33426, 33427, 33600, 33602, 33732, 33425, 33426, 33427, 33430, 33425, 33430                                                                                                                                                                                                                                                                                                                     |
| Open heart valvuloplasty of pulmonary valve without replacement, replacement with tissue graft, or other replacement | 35.13, 35.25, 35.26   | 33476, 33478, 33602, 33920, 33413, 33475, 33475                                                                                                                                                                                                                                                                                                                                                        |
| Open heart valvuloplasty of tricuspid valve without replacement, replacement with tissue graft, or other replacement | 35.14, 35.27, 35.28   | 33460, 33463, 33464, 33468, 33600, 33463, 33465, 33460, 33463, 33464, 33465                                                                                                                                                                                                                                                                                                                            |
| Operations on structures adjacent to heart valves                                                                    | 35.3x                 | 33300, 33305, 33411, 33412, 33413, 33414, 33415, 33416, 33476, 33478, 33676, 33684, 33702, 33710, 33720, 33722                                                                                                                                                                                                                                                                                         |
| Pericardiectomy, including                                                                                           | 37.31, 37.32,         | 33030, 33031, 33050, 33542, 33120,                                                                                                                                                                                                                                                                                                                                                                     |

|                                                                                                                  |                            |                                                                                                                                                                                                                                              |
|------------------------------------------------------------------------------------------------------------------|----------------------------|----------------------------------------------------------------------------------------------------------------------------------------------------------------------------------------------------------------------------------------------|
| excision of aneurysm or other lesion (open approach) of heart. Excluding endovascular, thoracoscopic approaches. | 37.33                      | 33130, 33250, 33251, 33254, 33255, 33256, 33257, 33258, 33259, 33261, 33542                                                                                                                                                                  |
| Surgery on the atrial or ventricular septa                                                                       | 35.4x, 35.5x, 35.6x, 35.7x | 33770, 33545, 33608, 33610, 33611, 33612, 33641, 33645, 33645, 33647, 33660, 33665, 33670, 33675, 33676, 33677, 33681, 33684, 33688, 33702, 33710, 33735, 33736, 33737, 33771, 33776, 33780, 33782, 33783, 33999, 92992, 92993, 93580, 93581 |

The NIS was searched from 1998–2013 to identify patients undergoing cardiac surgery. An “x” next to a code indicates that all nested codes were searched, e.g., “37.5x” indicates that “37.51–37.55” were searched. CPT: Current Procedural Terminology; ICD-9-CM: International Classification of Diseases, Ninth Revision, Clinical Modification.
