# Supplementary material
Source: PubMed Central journal article supplement (PMC5542395)
Supplement: NIHMS879413-supplement-supplemental_table_2.pdf [file NIHMS879413-supplement-supplemental_table_2.pdf]

Supplementary Table 2. ICD-9-CM codes of suspected risk factors searched in the National Inpatient Sample (NIS) from 1998–2013

| <b>Suspected Risk Factor</b>                | <b>ICD-9-CM Codes Searched</b>                                           |
|---------------------------------------------|--------------------------------------------------------------------------|
| Acute coronary syndrome                     | 410.x                                                                    |
| Anemia                                      | 280.x, 285.2x                                                            |
| Aortic and mitral stenosis or insufficiency | 396.x                                                                    |
| Aortic insufficiency                        | 395.1, 746.4                                                             |
| Aortic stenosis                             | 395.0, 746.3                                                             |
| Aortic stenosis and insufficiency           | 395.2                                                                    |
| Atrial fibrillation                         | 427.3x                                                                   |
| Cardiogenic shock                           | 785.51                                                                   |
| Cardiomyopathy                              | 425.x                                                                    |
| Carotid stenosis                            | 433.1x                                                                   |
| Congestive heart failure                    | 428.0                                                                    |
| Coronary artery disease                     | 411.x, 412, 413.x, 414.00–414.06,<br>414.3, 414.8, 414.9, V45.81, V45.82 |
| DM type 1                                   | 250.01, 250.03                                                           |
| DM type 2                                   | 250.00, 250.02                                                           |
| DM with neurological manifestations         | 250.60, 250.62                                                           |
| DM with ophthalmic manifestations           | 362.01–362.06, 250.5x                                                    |
| DM with renal manifestations                | 250.40, 250.42                                                           |
| Embolitic stroke                            | 434.11                                                                   |
| Giant cell arteritis                        | 446.5                                                                    |
| Hypercoagulable state*                      | 289.81, 289.82, 270.4, 795.79                                            |
| Hyperlipidemia                              | 272.0–272.4                                                              |
| Hypertension                                | 401.x                                                                    |
| Hypertensive heart disease                  | 402.x                                                                    |
| Mitral insufficiency                        | 746.6, 394.1                                                             |
| Mitral stenosis                             | 746.5, 394.0                                                             |
| Mitral stenosis and insufficiency           | 394.4                                                                    |
| Myxoma                                      | 212.7, 164.1                                                             |
| Obesity                                     | 278.0x                                                                   |
| Other aortic valve disease                  | 395.9                                                                    |
| Other mitral valve disease                  | 394.9                                                                    |
| Other stroke                                | 997.02, 434.91                                                           |
| Peripheral vascular disease                 | 443.9                                                                    |
| Postoperative bleed                         | 285.1                                                                    |
| Smoking                                     | V15.82, 305.1                                                            |
| Thrombocytopenia                            | 287.30, 287.31, 287.33, 287.39,<br>287.4x, 287.5, 287.8, 287.9           |
| Thrombotic stroke                           | 434.01                                                                   |
| Transfusion                                 | 99.00, 99.04                                                             |
| Transient cerebral ischemia                 | 435.x                                                                    |
| Ventricular septal defect                   | 745.4                                                                    |

Suspected risk factors were searched in the NIS among patients undergoing cardiac surgery. An “x” next to a code indicates that all nested codes were searched. e.g., “278.0x” indicates that “278.00–278.03” were searched. Each risk factor was included in the multivariate models as independent variables. \*Hypercoagulable state includes: 289.81: primary hypercoagulable state; 289.82: Secondary hypercoagulable state; 270.4: Disturbances of sulfur-bearing amino-acid metabolism (as a proxy for homocystinuria); 795.79: Other and unspecified nonspecific immunological findings (includes presence of antiphospholipid antibody). DM with ophthalmic complications includes: diabetic retinopathy (362.01–362.06, excluding diabetic macular edema) and diabetes with ophthalmic manifestations (250.5x). Acute coronary syndrome includes codes for initial, unspecified, and subsequent episodes of care for myocardial infarction. DM: diabetes mellitus; ICD-9-CM: International Classification of Diseases, Ninth Revision, Clinical Modification.
