# Supplementary material
Source: PubMed Central journal article supplement (PMC5542395)
Supplement: NIHMS879413-supplement-supplemental_table_3.pdf [file NIHMS879413-supplement-supplemental_table_3.pdf]

Supplementary Table 3. Non-significant parameters in Multivariable analysis for retinal artery occlusion (RAO) and cardiac surgery in the National Inpatient Sample (NIS), 1998 to 2013

| Covariate                                   | Odds ratio<br>[95%CI] | P-value | VIF  |
|---------------------------------------------|-----------------------|---------|------|
| Age group (years)                           |                       |         | 1.28 |
| 18–30                                       | Referent              |         |      |
| 31–40                                       | 1.61 [0.81–3.22]      | 0.17    |      |
| 41–50                                       | 1.71 [0.87–3.38]      | 0.12    |      |
| 51–60                                       | 1.66 [0.85–3.22]      | 0.13    |      |
| 61–70                                       | 1.68 [0.87–3.25]      | 0.12    |      |
| 71–80                                       | 1.53 [0.80–2.92]      | 0.19    |      |
| >80                                         | 1.14 [0.58–2.24]      | 0.71    |      |
| Elective                                    | 0.87 [0.73–1.04]      | 0.13    | 1.09 |
| Race:                                       |                       |         | 1.02 |
| White                                       | Referent              |         |      |
| Black                                       | 0.68 [0.46–1.02]      | 0.061   |      |
| Hispanic                                    | 0.79 [0.56–1.12]      | 0.18    |      |
| Asian or Pacific Islander                   | 0.60 [0.30–1.20]      | 0.15    |      |
| Native American                             | 0.98 [0.33–2.93]      | 0.98    |      |
| Other                                       | 0.74 [0.46–1.20]      | 0.22    |      |
| Year                                        | 1.00 [0.98–1.02]      | 0.81    | 1.29 |
| Anemia                                      | 1.13 [0.76–1.69]      | 0.55    | 1.03 |
| Aortic and mitral stenosis or insufficiency | 0.89 [0.65–1.20]      | 0.43    | 1.00 |
| Aortic stenosis                             | 0.48 [0.11–2.05]      | 0.32    | 1.02 |
| Aortic stenosis and insufficiency           | –                     | –       | –    |
| Cardiogenic shock                           | 0.90 [0.59–1.37]      | 0.63    | 1.17 |
| Cardiomyopathy                              | 0.89 [0.65–1.24]      | 0.50    | 1.09 |
| Coronary artery disease                     | 0.90 [0.71–1.13]      | 0.35    | 2.42 |
| DM type 1 with complications                | 0.53 [0.25–1.13]      | 0.10    | 1.02 |
| DM with neurological complications          | 0.65 [0.36–1.18]      | 0.16    | 1.10 |
| DM with renal complications                 | 0.36 [0.13–1.00]      | 0.051   | 1.09 |
| Hyperlipidemia                              | 1.12 [0.95–1.32]      | 0.17    | 1.23 |
| Hypertension                                | 1.06 [0.92–1.23]      | 0.44    | 1.18 |
| Hypertension with cardiac complications     | 1.18 [0.69–2.01]      | 0.54    | 1.03 |
| Intra-aortic balloon pump                   | 0.89 [0.65–1.21]      | 0.44    | 1.16 |
| Mitral insufficiency                        | 0.47 [0.11–1.97]      | 0.30    | 1.03 |
| Mitral stenosis                             | 1.41 [0.61–3.26]      | 0.42    | 1.04 |
| Mitral stenosis and insufficiency           | –                     | –       | –    |
| Obesity                                     | 0.87 [0.68–1.12]      | 0.27    | 1.08 |
| Other aortic valve disease                  | –                     | –       | –    |
| Other mitral valve disease                  | 2.05 [0.28–15.21]     | 0.48    | 1.00 |
| Peripheral vascular disease                 | 1.18 [0.89–1.56]      | 0.26    | 1.03 |
| Thrombotic stroke                           | 1.94 [0.26–14.68]     | 0.52    | 1.00 |

|                                                   |                  |      |      |
|---------------------------------------------------|------------------|------|------|
| Transfuse                                         | 1.16 [0.87–1.92] | 0.21 | 1.08 |
| Unspecified stroke                                | 1.29 [0.87–1.92] | 0.21 | 1.09 |
| Ventricular septal defect                         | 0.61 [0.15–2.46] | 0.48 | 1.04 |
| Cardiopulmonary bypass                            | 0.90 [0.76–1.07] | 0.23 | 1.05 |
| Heart transplant                                  | 0.53 [0.12–2.25] | 0.39 | 1.09 |
| Operations on structures adjacent to heart valves | 0.70 [0.45–1.11] | 0.13 | 1.06 |
| Pericardiectomy                                   | 1.05 [0.78–1.41] | 0.73 | 1.16 |
| Pulmonary valve surgery                           | 1.31 [0.47–3.64] | 0.60 | 1.02 |
| Tricuspid valve surgery                           | 0.91 [0.49–1.68] | 0.76 | 1.05 |
| Ventricular assist device                         | 1.95 [0.88–4.33] | 0.10 | 1.07 |

The multivariate model includes patients undergoing multiple procedures (i.e. a patient could undergo CABG and valve surgery, which would be considered as two different procedures). A separate model was thus run eliminating patients undergoing multiple procedures, i.e, the single procedure model. The results (not shown) were similar to this model (See Results section). Abbreviations: CABG: coronary artery bypass grafting; DM: diabetes mellitus; 95% CI: 95% confidence interval; VIF: variance inflation factor (< 10 indicates no collinearity). “–” Indicates insufficient numbers for analysis.
